# Supplementary material
Source: PubMed Central journal article supplement (PMC6737521)
Supplement: jama-322-946-s004.pdf [file jama-322-946-s004.pdf]

## Data Sharing Statement

Magaziner. Effect of a Multicomponent Home-Based Physical Therapy Intervention on Community Ambulation After Hip Fracture in Older Adults. *JAMA*. Published September 10, 2019.  
10.1001/jama.2019.12964

### Data

**Data available:** Yes

**Data types:** Deidentified participant data, Data dictionary

**How to access data:** Data should be requested from Dr. Magaziner - [jmagazin@som.umaryland.edu](mailto:jmagazin@som.umaryland.edu) - for one year from date of publication. After one year, data will be publicly available.

**When available:** With publication

### Supporting Documents

**Document types:** None

### Additional Information

**Who can access the data:** For the first year after publication researchers whose proposed use of the data has been approved.

**Types of analyses:** For the first year after publication, for any approved purpose.

**Mechanisms of data availability:** For the first year after publication without investigator support after approval of proposal and with a signed data access agreement.
